# Supplementary material
Source: publisher site journal article supplement (http://www.spandidos-publications.com/4567/downloadSupplementary)

Figure S1. Western blot analysis representing the expression of the autophagy marker protein, LC3B, in JSC-1 cells under different conditions, of serum stress exposure, stress recovery with complete media and theaflavin and Cl-Cur derivative treatment at their respective effective concentrations. GAPDH was used as the loading control. The relative quantified intensity values were normalized to the untreated control and the final value is presented with the blots under each lane. Thea, theaflavin; Cl-cur, Cl-curcumin.

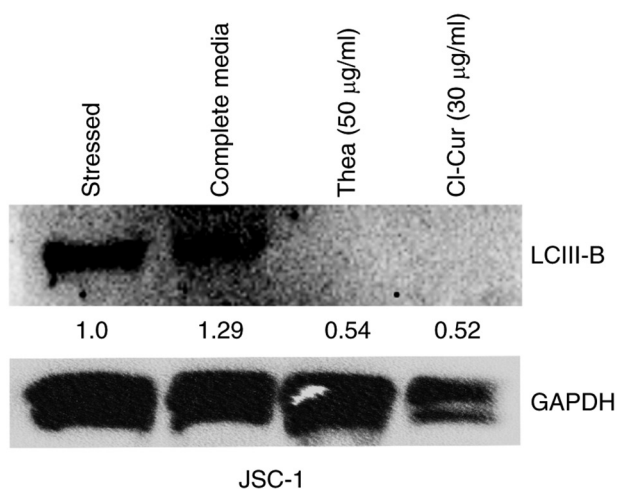

Supplement: Supplementary file 1 [file downloadSupplementary]
